# Supplementary material for: Whole Blood Transcriptomics and Urinary Metabolomics to Define Adaptive Biochemical Pathways of High-Intensity Exercise in 50-60 Year Old Masters Athletes
Source: PLoS One. 2014 Mar 18;9(3):e92031. doi: 10.1371/journal.pone.0092031 (PMC3958411; doi:10.1371/journal.pone.0092031)
Supplement: Table S4 — List of differentially expressed probes between athlete and control subjects at time-point T3 (24 hours after exercise). (XLSX) [file pone.0092031.s004.xlsx]

## Sheet: Supplement 4
Supporting Table 4 (Table S4): List of differentially expressed probes between athlete and control subjects at time-point T3
Comparison 1 - <Athlete> vs. <Control> (385:234) (number of probes:number of genes)
Probe	Comparison Regulation	Comparison Log ratio (Base 2)	Comparison p-value	Gene Symbol	GeneName	Biological Process	Cellular Component	Molecular Function
A_23_P158297	DOWN	-4.1026	0	BTNL3	butyrophilin-like 3	lipid metabolic process	integral to membrane, membrane
A_23_P3651	DOWN	-3.2897	0	HBZ	hemoglobin, zeta	oxygen transport, transport	hemoglobin complex	heme binding, iron ion binding, metal ion binding, oxygen binding, oxygen transporter activity
A_32_P80245	DOWN	-3.2531	0			regulation of transcription; DNA-dependent	intracellular	nucleic acid binding, zinc ion binding
A_32_P21579	UP	2.6098	0.0024	TRDMT1	tRNA aspartic acid methyltransferase 1	DNA methylation, tRNA processing	nucleus	DNA (cytosine-5-, DNA binding, RNA binding, methyltransferase activity, tRNA (cytosine-5-, transferase activity
A_23_P74852	UP	2.579	0	PIGC	phosphatidylinositol glycan anchor biosynthesis, class C	GPI anchor biosynthetic process	endoplasmic reticulum, endoplasmic reticulum membrane, integral to membrane, membrane	phosphatidylinositol N-acetylglucosaminyltransferase activity, transferase activity; transferring glycosyl groups
A_23_P37914	DOWN	-2.4095	0.0003	SLC5A11	solute carrier family 5 (sodium/glucose cotransporter), member 11	ion transport, sodium ion transport, transport	integral to membrane, membrane	sugar porter activity, transporter activity
DCP_1_7	DOWN	-2.3792	0.0022
A_23_P369090	UP	2.3767	0.0041
A_24_P763361	UP	2.3619	0.0017
A_32_P103966	UP	2.3367	0.0006
A_24_P34865	DOWN	-2.2937	0.0003	BTNL3	butyrophilin-like 3	lipid metabolic process	integral to membrane, membrane
A_23_P254944	UP	2.2391	0.0026	GSTT1	glutathione S-transferase theta 1	response to stress		glutathione transferase activity, transferase activity
A_32_P9543	UP	2.2146	0.0017	APOBEC3A	apolipoprotein B mRNA editing enzyme, catalytic polypeptide-like 3A	biological_process	cellular_component	hydrolase activity, hydrolase activity; acting on carbon-nitrogen (but not peptide, metal ion binding, molecular_function, zinc ion binding
A_23_P61042	DOWN	-2.2005	0			immune response	membrane fraction	antigen binding
A_24_P185368	DOWN	-2.1863	0.002	ZSCAN4	zinc finger and SCAN domain containing 4	regulation of transcription; DNA-dependent, transcription	intracellular, nucleus	metal ion binding, transcription factor activity, zinc ion binding
A_24_P24371	DOWN	-2.1412	0.0003			immune response	membrane fraction	antigen binding
A_24_P227617	UP	2.1273	0.0038	CHURC1	churchill domain containing 1	multicellular organismal development, positive regulation of transcription, regulation of transcription; DNA-dependent, transcription		transcriptional activator activity, zinc ion binding
A_23_P326020	DOWN	-2.1146	0.0075	CSMD3	CUB and Sushi multiple domains 3		integral to membrane, membrane
A_24_P845223	DOWN	-2.0778	0.0336
A_24_P221375	UP	2.0466	0.0068
A_24_P319001	UP	2.0272	0.0128	GSTT1	glutathione S-transferase theta 1	response to stress		glutathione transferase activity, transferase activity
A_24_P85888	UP	2.0172	0.0156	SCN3A	sodium channel, voltage-gated, type III, alpha subunit	ion transport, sodium ion transport	integral to membrane, membrane, voltage-gated sodium channel complex	sodium ion binding, voltage-gated sodium channel activity
A_24_P181254	DOWN	-1.9813	0.0002	OLFM4	olfactomedin 4		membrane	latrotoxin receptor activity
A_23_P250784	UP	1.9734	0.0197	KCNIP4	Kv channel interacting protein 4	ion transport, potassium ion transport		calcium ion binding, ion channel activity, potassium channel activity, potassium ion binding, protein binding, voltage-gated ion channel activity
A_24_P528586	DOWN	-1.9719	0.0241
A_23_P92672	UP	1.9525	0.0582	OCLN	occludin	protein complex assembly	integral to membrane, membrane, plasma membrane, tight junction	structural molecule activity
A_23_P158817	DOWN	-1.9428	0.0006	IGH@	immunoglobulin heavy locus	antigen processing and presentation of peptide antigen via MHC class I	MHC class I protein complex
A_23_P218047	DOWN	-1.9385	0.0065	KRT5	keratin 5 (epidermolysis bullosa simplex, Dowling-Meara/Kobner/Weber-Cockayne types)	epidermis development	intermediate filament	protein binding, structural constituent of cytoskeleton, structural molecule activity
A_24_P169873	DOWN	-1.9331	0.0003			immune response	membrane fraction	antigen binding
A_23_P320371	UP	1.915	0.0503	LPIN1	lipin 1	lipid metabolic process, regulation of fat cell differentiation	nucleus	molecular_function
A_24_P188878	UP	1.8941	0.0002	RPL34	ribosomal protein L34	translation	cytosolic large ribosomal subunit (sensu Eukaryota, intracellular, ribosome	RNA binding, structural constituent of ribosome
A_32_P127454	UP	1.8939	0.0004
A_24_P686247	UP	1.8827	0.0067
A_24_P203909	UP	1.872	0.0004	RPL34	ribosomal protein L34	translation	cytosolic large ribosomal subunit (sensu Eukaryota, intracellular, ribosome	RNA binding, structural constituent of ribosome
A_32_P220127	UP	1.8702	0.0022	RPL34	ribosomal protein L34	translation	cytosolic large ribosomal subunit (sensu Eukaryota, intracellular, ribosome	RNA binding, structural constituent of ribosome
A_24_P6975	UP	1.866	0.0064	LOC342994	similar to ribosomal protein L34
A_23_P7229	UP	1.8631	0.0022	RPL34	ribosomal protein L34	translation	cytosolic large ribosomal subunit (sensu Eukaryota, intracellular, ribosome	RNA binding, structural constituent of ribosome
A_23_P205177	DOWN	-1.8486	0.0388	F10	coagulation factor X	blood coagulation, proteolysis	extracellular region	calcium ion binding, coagulation factor Xa activity, peptidase activity
A_24_P171043	DOWN	-1.8386	0.0547	DKFZP547L112	hypothetical protein DKFZp547L112
A_24_P737815	UP	1.8356	0.0461
A_24_P351466	UP	1.8321	0.0352	KIAA1524	KIAA1524		cytoplasm	binding
A_24_P15371	DOWN	-1.8305	0.0459
A_23_P24884	DOWN	-1.8238	0.0022	ST5	suppression of tumorigenicity 5			protein binding
A_24_P937506	DOWN	-1.8214	0.0889
A_23_P47464	DOWN	-1.8092	0.0192	OR5AP2	olfactory receptor, family 5, subfamily AP, member 2	G-protein coupled receptor protein signaling pathway, response to stimulus, sensory perception of smell, signal transduction	integral to membrane, membrane	olfactory receptor activity, receptor activity
A_23_P57626	UP	1.8072	0.022
A_32_P200144	DOWN	-1.7965	0.0006	IGH@	immunoglobulin heavy locus	antigen processing and presentation of peptide antigen via MHC class I	MHC class I protein complex
A_24_P579862	UP	1.7875	0.0518
A_23_P7221	UP	1.78	0.0041	RPL34	ribosomal protein L34	translation	cytosolic large ribosomal subunit (sensu Eukaryota, intracellular, ribosome	RNA binding, structural constituent of ribosome
A_32_P780817	UP	1.7778	0.0427	CT45-1	cancer/testis antigen CT45-1
A_23_P381772	UP	1.7769	0.0418
A_24_P662972	UP	1.7718	0.0374
A_24_P303118	UP	1.7671	0.0041	RPL34	ribosomal protein L34	translation	cytosolic large ribosomal subunit (sensu Eukaryota, intracellular, ribosome	RNA binding, structural constituent of ribosome
A_24_P63078	DOWN	-1.7671	0.0601	YSK4	yeast Sps1/Ste20-related kinase 4 (S. cerevisiae)	protein amino acid phosphorylation		ATP binding, nucleotide binding, protein serine/threonine kinase activity, transferase activity
A_23_P149270	DOWN	-1.7559	0.0345
A_23_P111978	DOWN	-1.7519	0.0326	KCNK9	potassium channel, subfamily K, member 9	ion transport, potassium ion transport	integral to membrane, membrane, membrane fraction	potassium channel activity, potassium ion binding, voltage-gated ion channel activity
A_24_P924641	UP	1.7498	0.0556
A_24_P827096	DOWN	-1.7472	0.0922
A_32_P117672	UP	1.7463	0.0197
A_32_P168670	UP	1.7399	0.0535
A_24_P76757	DOWN	-1.7347	0.0628
A_23_P123596	DOWN	-1.7309	0.07	GLDC	glycine dehydrogenase (decarboxylating)	glycine catabolic process, glycine metabolic process	glycine dehydrogenase complex (decarboxylating, mitochondrion	catalytic activity, electron carrier activity, glycine dehydrogenase (decarboxylating, pyridoxal phosphate binding
A_32_P39669	DOWN	-1.7304	0.0547
A_23_P136026	DOWN	-1.7304	0.0041	IGHA1	immunoglobulin heavy constant alpha 1	antigen processing and presentation of peptide antigen via MHC class I	MHC class I protein complex	protein binding
A_23_P200955	UP	1.7172	0.0046
A_24_P926580	UP	1.7111	0.0529
A_23_P83976	UP	1.7073	0.056	CCDC46	coiled-coil domain containing 46
A_23_P12241	DOWN	-1.6992	0.0896	MCOLN3	mucolipin 3	ion transport	integral to membrane, membrane	ion channel activity
A_32_P64688	UP	1.6969	0.0133
A_24_P239531	DOWN	-1.6903	0.0475	ZFYVE16	zinc finger, FYVE domain containing 16	endosome transport, protein targeting to lysosome, regulation of endocytosis, signal transduction, vesicle organization and biogenesis	early endosome, membrane	metal ion binding, phosphatidylinositol binding, protein binding, protein transporter activity, zinc ion binding
A_24_P41551	UP	1.687	0.0003	LOC641790	similar to ribosomal protein L31
DCP_1_4	DOWN	-1.6828	0.0027
A_23_P204225	UP	1.6775	0.0859
A_32_P158053	UP	1.6703	0.0472
A_24_P917306	DOWN	-1.6636	0.034	LOC728516	hypothetical protein LOC728516
A_23_P318989	DOWN	-1.6626	0.034	C3orf24	chromosome 3 open reading frame 24
A_32_P157927	DOWN	-1.6367	0.0022			immune response	extracellular region	antigen binding
A_32_P41858	UP	1.6358	0.0987
A_24_P721638	UP	1.6336	0.0474
A_32_P190488	UP	1.6324	0.0065	hCG_26523	hCG26523
A_32_P148122	DOWN	-1.6306	0	IGKC	immunoglobulin kappa constant	antigen processing and presentation of peptide antigen via MHC class I, immune response	MHC class I protein complex, extracellular region	antigen binding, protein binding
A_23_P218126	DOWN	-1.6298	0.0029	IFI6	interferon, alpha-inducible protein 6	anti-apoptosis, immune response, negative regulation of caspase activity, negative regulation of mitochondrial depolarization, release of cytochrome c from mitochondria	integral to membrane, membrane, mitochondrion	protein binding
A_24_P350589	UP	1.6242	0.0711	RNF150	ring finger protein 150		integral to membrane, membrane	metal ion binding, protein binding, zinc ion binding
A_24_P669854	DOWN	-1.62	0.0708
A_32_P217471	UP	1.616	0.0922	MYO1B	myosin IB		myosin complex	ATP binding, actin binding, calmodulin binding, motor activity, nucleotide binding
A_32_P23748	DOWN	-1.6138	0.0099
A_32_P24731	DOWN	-1.6138	0.0482
A_23_P21260	DOWN	-1.612	0.0098			immune response	extracellular region	antigen binding
A_24_P324224	UP	1.612	0.0097
A_32_P77252	UP	1.611	0.0277
A_24_P917650	UP	1.6105	0.0603
A_24_P257224	DOWN	-1.6032	0.0461	TPO	thyroid peroxidase	hormone biosynthetic process, hydrogen peroxide catabolic process, response to oxidative stress, thyroid hormone generation	cellular_component, integral to membrane, integral to plasma membrane, membrane	calcium ion binding, iodide peroxidase activity, iron ion binding, metal ion binding, oxidoreductase activity, peroxidase activity
A_32_P11931	UP	1.6026	0.0036	LOC441073	similar to 60S ribosomal protein L26 (Silica-induced gene 20 protein) (SIG-20)
A_32_P106669	UP	1.6014	0.0361
A_24_P297551	UP	1.5899	0.0195	FAM19A2	family with sequence similarity 19 (chemokine (C-C motif)-like), member A2
A_24_P845082	UP	1.586	0.0041
A_32_P199002	UP	1.5852	0.0656
A_24_P817490	UP	1.5845	0.0503
A_23_P22232	UP	1.5833	0.0041	KLRC2	killer cell lectin-like receptor subfamily C, member 2	cellular defense response, signal transduction	integral to plasma membrane, membrane	sugar binding, transmembrane receptor activity
A_23_P51797	UP	1.582	0.0934
A_23_P84791	DOWN	-1.58	0.001
A_24_P52697	DOWN	-1.5782	0.0372	H19	H19, imprinted maternally expressed untranslated mRNA
A_24_P366165	UP	1.5757	0.0024	LOC391126	similar to 60S ribosomal protein L26 (Silica-induced gene 20 protein) (SIG-20)
A_23_P38649	DOWN	-1.5728	0.0263	MC2R	melanocortin 2 receptor (adrenocorticotropic hormone)	G-protein signaling; coupled to cyclic nucleotide second messenger, signal transduction	integral to plasma membrane, membrane	adrenocorticotropin receptor activity, receptor activity, rhodopsin-like receptor activity
A_24_P418712	UP	1.5718	0.0029
A_24_P366546	UP	1.5704	0.0038	RPL31P10	ribosomal protein L31 pseudogene 10
A_23_P139050	DOWN	-1.5671	0.0221	OR8D2	olfactory receptor, family 8, subfamily D, member 2	G-protein coupled receptor protein signaling pathway, response to stimulus, sensory perception of smell, signal transduction	integral to membrane, membrane	olfactory receptor activity, receptor activity
A_23_P33045	UP	1.5668	0.045	RPL26	ribosomal protein L26	translation	cytosolic large ribosomal subunit (sensu Eukaryota, intracellular	RNA binding, protein binding, structural constituent of ribosome
A_23_P332178	DOWN	-1.5629	0.0796	GRM2	glutamate receptor, metabotropic 2	G-protein coupled receptor protein signaling pathway, negative regulation of adenylate cyclase activity, signal transduction, synaptic transmission	integral to plasma membrane, membrane	metabotropic glutamate; GABA-B-like receptor activity, receptor activity
A_24_P379820	DOWN	-1.5573	0.0131	ITM2C	integral membrane protein 2C		Golgi apparatus, integral to membrane, membrane
A_32_P145153	UP	1.5543	0.0098	RPL31	ribosomal protein L31	translation	cytosolic large ribosomal subunit (sensu Eukaryota, intracellular, ribosome	RNA binding, structural constituent of ribosome
A_23_P218726	DOWN	-1.5526	0.0079	CPNE1	copine I	lipid metabolic process, vesicle-mediated transport		calcium-dependent phospholipid binding, phosphatidylserine binding, transporter activity
A_24_P201702	UP	1.5518	0.0026	CLEC2B	C-type lectin domain family 2, member B		integral to plasma membrane, membrane	sugar binding
A_24_P11100	UP	1.5518	0.0488	ZMAT1	zinc finger, matrin type 1		intracellular, nucleus	nucleic acid binding, zinc ion binding
A_32_P93782	UP	1.5517	0.0197	RPL26	ribosomal protein L26	translation	cytosolic large ribosomal subunit (sensu Eukaryota, intracellular	RNA binding, protein binding, structural constituent of ribosome
A_23_P104876	UP	1.5515	0.0503	SPA17	sperm autoantigenic protein 17	binding of sperm to zona pellucida, signal transduction, single fertilization, spermatogenesis	membrane	cAMP-dependent protein kinase regulator activity
A_32_P22539	UP	1.5512	0.0162	hCG_26523	hCG26523
A_24_P626951	DOWN	-1.5488	0.0026					protein binding
A_32_P68773	DOWN	-1.5482	0.0534
A_23_P151046	UP	1.5478	0.0014	KLRC1	killer cell lectin-like receptor subfamily C, member 1	cell surface receptor linked signal transduction	integral to plasma membrane, membrane	sugar binding, transmembrane receptor activity
A_23_P166023	UP	1.5424	0.0472	PFDN4	prefoldin subunit 4	chaperonin-mediated tubulin folding, protein folding	cytosol, prefoldin complex	chaperone binding, unfolded protein binding
A_23_P116145	UP	1.5328	0.0971	DDI1	DDI1, DNA-damage inducible 1, homolog 1 (S. cerevisiae)	protein modification process, proteolysis		aspartic-type endopeptidase activity
A_23_P81262	DOWN	-1.5314	0.0486	PCDHB4	protocadherin beta 4	calcium-dependent cell-cell adhesion, cell adhesion, homophilic cell adhesion, synaptic transmission, synaptogenesis	integral to plasma membrane, membrane	calcium ion binding, protein binding
A_24_P11045	UP	1.5153	0.0006			electron transport	integral to membrane, membrane, mitochondrial respiratory chain, mitochondrion	cytochrome-c oxidase activity, oxidoreductase activity
A_23_P38275	UP	1.5153	0.0024			translation	cytosolic ribosome (sensu Eukaryota, large ribosomal subunit	structural constituent of ribosome
A_23_P159650	UP	1.5133	0.0043	COX7B	cytochrome c oxidase subunit VIIb	electron transport	integral to membrane, membrane, mitochondrial respiratory chain, mitochondrion	cytochrome-c oxidase activity, oxidoreductase activity
A_23_P58770	DOWN	-1.5112	0.0896	HAND1	heart and neural crest derivatives expressed 1	angiogenesis, cell differentiation, heart development, multicellular organismal development, negative regulation of transcription from RNA polymerase II promoter, positive regulation of transcription from RNA polymerase II promoter, regulation of transcription; DNA-dependent, transcription from RNA polymerase II promoter	nucleus	protein heterodimerization activity, protein homodimerization activity, transcription factor activity, transcription factor binding, transcriptional repressor activity
A_32_P143596	UP	1.5077	0.0079
A_24_P213783	UP	1.5031	0.0043	RPL31	ribosomal protein L31	translation	cytosolic large ribosomal subunit (sensu Eukaryota, intracellular, ribosome	RNA binding, structural constituent of ribosome
A_24_P528858	UP	1.4997	0.0841	ZNF678	zinc finger protein 678	regulation of transcription; DNA-dependent, transcription	intracellular, nucleus	DNA binding, metal ion binding, zinc ion binding
A_23_P143958	UP	1.4931	0.0243	RPL22L1	ribosomal protein L22-like 1	translation	intracellular, ribosome	structural constituent of ribosome
A_32_P117338	DOWN	-1.488	0.045	AFG3L2	AFG3 ATPase family gene 3-like 2 (yeast)	protein catabolic process, proteolysis	integral to membrane, membrane, mitochondrial inner membrane, mitochondrion	ATP binding, metal ion binding, metalloendopeptidase activity, nucleoside-triphosphatase activity, nucleotide binding, unfolded protein binding, zinc ion binding
A_24_P272290	DOWN	-1.4849	0.0935	C6orf145	chromosome 6 open reading frame 145
A_23_P144497	UP	1.4835	0.0161	RPS3A	ribosomal protein S3A	induction of apoptosis, translational initiation	cytosol, cytosolic small ribosomal subunit (sensu Eukaryota, intracellular, nucleus, ribosome	RNA binding, protein binding, structural constituent of ribosome
A_32_P49392	UP	1.4832	0.034
A_24_P329795	DOWN	-1.48	0.0979	C10orf10	chromosome 10 open reading frame 10		mitochondrion
A_32_P167577	UP	1.4798	0.0098
A_24_P333993	DOWN	-1.4768	0.0111	OR2W3	olfactory receptor, family 2, subfamily W, member 3	G-protein coupled receptor protein signaling pathway, response to stimulus, sensory perception of smell, signal transduction	integral to membrane, membrane	olfactory receptor activity, receptor activity
A_32_P113154	UP	1.4754	0.0093	LOC730861	similar to 40S ribosomal protein S3a (V-fos transformation effector protein)
A_24_P589736	UP	1.4718	0.0896
A_24_P28977	UP	1.4715	0.0569	TRPC1	transient receptor potential cation channel, subfamily C, member 1	calcium ion transport, ion transport	integral to plasma membrane, plasma membrane	calcium ion binding, ion channel activity, protein binding, store-operated calcium channel activity
A_23_P209176	DOWN	-1.4579	0.0089	TMPRSS9	transmembrane protease, serine 9	proteolysis	integral to membrane, membrane	peptidase activity, serine-type endopeptidase activity
A_32_P208178	UP	1.4566	0.0091	RPS3A	ribosomal protein S3A	induction of apoptosis, translational initiation	cytosol, cytosolic small ribosomal subunit (sensu Eukaryota, intracellular, nucleus, ribosome	RNA binding, protein binding, structural constituent of ribosome
A_23_P325606	DOWN	-1.4565	0.0924	ESX1	extraembryonic, spermatogenesis, homeobox 1 homolog (mouse)	regulation of transcription; DNA-dependent	nucleus	sequence-specific DNA binding, transcription factor activity
DCP_1_2	DOWN	-1.4534	0.017
A_23_P70328	UP	1.4482	0.0162	CENPQ	centromere protein Q		chromosome, chromosome; pericentric region, nucleus
A_32_P114215	UP	1.4458	0.012	COMMD6	COMM domain containing 6
A_24_P914434	DOWN	-1.4401	0.054	GSTM3	glutathione S-transferase M3 (brain)	establishment of blood-nerve barrier, metabolic process		glutathione transferase activity, protein binding, transferase activity
A_23_P127978	DOWN	-1.4375	0.077	B3GNT6	UDP-GlcNAc:betaGal beta-1,3-N-acetylglucosaminyltransferase 6 (core 3 synthase)	O-glycan processing; core 3, protein amino acid glycosylation	membrane	beta-1;3-galactosyl-O-glycosyl-glycoprotein beta-1;3-N-acetylglucosaminyltransferase activity, galactosyltransferase activity, transferase activity; transferring glycosyl groups
A_32_P50417	UP	1.4364	0.0091	LOC649314	similar to 40S ribosomal protein S3a (V-fos transformation effector protein)
A_24_P916195	DOWN	-1.432	0.0601	GTSE1	G-2 and S-phase expressed 1	DNA damage response; signal transduction by p53 class mediator resulting in cell cycle arrest, G2 phase of mitotic cell cycle, microtubule-based process	cytoplasmic microtubule	molecular_function
A_24_P57837	UP	1.4299	0.0389			translation	cytosolic ribosome (sensu Eukaryota, cytosolic small ribosomal subunit (sensu Eukaryota	structural constituent of ribosome
A_24_P392231	UP	1.4291	0.0138	LOC641784	similar to ribosomal protein L31
A_32_P4532	UP	1.4254	0.0064	LOC643932	similar to 40S ribosomal protein S3a (V-fos transformation effector protein)
A_24_P755505	UP	1.4201	0.0079
A_24_P587938	UP	1.4173	0.0046
A_23_P31671	UP	1.4154	0.0304	UQCRB	ubiquinol-cytochrome c reductase binding protein	aerobic respiration, mitochondrial electron transport; ubiquinol to cytochrome c, oxidative phosphorylation, transport	membrane, mitochondrial respiratory chain, mitochondrion	oxidoreductase activity, ubiquinol-cytochrome-c reductase activity
A_23_P138655	DOWN	-1.4109	0.0555	CYP26A1	cytochrome P450, family 26, subfamily A, polypeptide 1	electron transport, metabolic process, retinoic acid metabolic process	endoplasmic reticulum, membrane, microsome	heme binding, iron ion binding, metal ion binding, monooxygenase activity, oxygen binding, retinoic acid 4-hydroxylase activity
A_23_P434809	UP	1.4081	0.0067	S100A8	S100 calcium binding protein A8	inflammatory response	extracellular space	calcium ion binding
A_24_P935893	DOWN	-1.405	0.0286	FAM46C	family with sequence similarity 46, member C
A_24_P298228	UP	1.3952	0.019	LOC222005	similar to ADP/ATP translocase 2 (Adenine nucleotide translocator 2) (ANT 2) (ADP,ATP carrier protein 2) (Solute carrier family 25 member 5) (ADP,ATP carrier protein, fibroblast isoform)
A_24_P264143	UP	1.3887	0.0179	RPSAP10	ribosomal protein SA pseudogene 10
A_23_P19886	DOWN	-1.3877	0.0195	NPSR1	neuropeptide S receptor 1	G-protein coupled receptor protein signaling pathway, signal transduction	integral to membrane, membrane	receptor activity, rhodopsin-like receptor activity, vasopressin receptor activity
A_23_P144126	DOWN	-1.385	0.045	FETUB	fetuin B	biological_process	extracellular region	cysteine protease inhibitor activity, molecular_function
A_23_P20363	UP	1.3743	0.0215	C8orf70	chromosome 8 open reading frame 70
A_32_P163533	UP	1.369	0.0388	ZNF322B	zinc finger protein 322B	regulation of transcription; DNA-dependent, transcription	intracellular, nucleus	DNA binding, metal ion binding, zinc ion binding
A_24_P205364	DOWN	-1.3677	0.0275	SHMT1	serine hydroxymethyltransferase 1 (soluble)	L-serine catabolic process, L-serine metabolic process, glycine metabolic process, one-carbon compound metabolic process	cytosol	glycine hydroxymethyltransferase activity, pyridoxal phosphate binding, transferase activity
A_23_P59388	DOWN	-1.3629	0.0215	DST	dystonin	actin cytoskeleton organization and biogenesis, cell adhesion, cell cycle arrest, cytoskeleton organization and biogenesis, integrin-mediated signaling pathway, intermediate filament cytoskeleton organization and biogenesis	basement membrane, cytoplasm, cytoplasmic membrane-bound vesicle, cytoskeleton, extracellular space, hemidesmosome, intercellular junction	actin binding, actin filament binding, calcium ion binding, integrin binding, protein C-terminus binding, protein binding, structural constituent of cytoskeleton
A_24_P144383	UP	1.3587	0.0343
A_23_P166848	DOWN	-1.3586	0.0359	LTF	lactotransferrin	defense response to bacterium, humoral immune response, ion transport, iron ion homeostasis, iron ion transport	extracellular region, extracellular space	ferric iron binding, metal ion binding, peptidase activity, serine-type endopeptidase activity
A_23_P123164	DOWN	-1.3568	0.0141	OR6W1P	olfactory receptor, family 6, subfamily W, member 1 pseudogene	G-protein coupled receptor protein signaling pathway, response to stimulus, sensory perception of smell, signal transduction	integral to membrane, membrane	olfactory receptor activity, receptor activity
A_24_P922948	UP	1.3541	0.045	FAM118A	family with sequence similarity 118, member A		integral to membrane, membrane
A_32_P126688	UP	1.352	0.0215
A_24_P153416	DOWN	-1.3505	0.0237	KIR2DS1	killer cell immunoglobulin-like receptor, two domains, short cytoplasmic tail, 1	immune response	integral to membrane, membrane	transmembrane receptor activity
A_23_P168105	DOWN	-1.3484	0.0114	EGFL8	EGF-like-domain, multiple 8	in utero embryonic development	integral to membrane	calcium ion binding, palmitoyl-(protein
DCP_1_1	DOWN	-1.3465	0.041
A_24_P940288	DOWN	-1.3449	0.0026	PGS1	phosphatidylglycerophosphate synthase 1	metabolic process, phospholipid biosynthetic process	endoplasmic reticulum, mitochondrion	CDP-diacylglycerol-glycerol-3-phosphate 3-phosphatidyltransferase activity, catalytic activity
A_23_P73328	DOWN	-1.3373	0.0119
A_32_P73222	UP	1.3272	0.0144
A_23_P217609	UP	1.3247	0.034	RPL36A	ribosomal protein L36a	biological_process, translation	cytoplasm, intracellular, ribosome	molecular_function, protein binding, structural constituent of ribosome
A_24_P221445	UP	1.3224	0.0627	OXR1	oxidation resistance 1	cell wall catabolic process, response to oxidative stress	cellular_component, mitochondrion	molecular_function
A_32_P170879	DOWN	-1.3204	0.0841
A_32_P58074	UP	1.3171	0.0279	RPS3A	ribosomal protein S3A	induction of apoptosis, translational initiation	cytosol, cytosolic small ribosomal subunit (sensu Eukaryota, intracellular, nucleus, ribosome	RNA binding, protein binding, structural constituent of ribosome
A_32_P83803	DOWN	-1.3148	0.0722
A_23_P134684	UP	1.3142	0.0529	HMBOX1	homeobox containing 1	regulation of transcription; DNA-dependent	nucleus	sequence-specific DNA binding, transcription factor activity
A_23_P419156	DOWN	-1.3091	0.0461	OPN1SW	opsin 1 (cone pigments), short-wave-sensitive (color blindness, tritan)	G-protein coupled receptor protein signaling pathway, phototransduction, protein-chromophore linkage, response to stimulus, signal transduction, visual perception	integral to plasma membrane, membrane, photoreceptor outer segment	blue light photoreceptor activity, receptor activity, rhodopsin-like receptor activity
A_24_P383999	UP	1.3087	0.0249	RPS3A	ribosomal protein S3A	induction of apoptosis, translational initiation	cytosol, cytosolic small ribosomal subunit (sensu Eukaryota, intracellular, nucleus, ribosome	RNA binding, protein binding, structural constituent of ribosome
A_24_P840343	DOWN	-1.3023	0.0607
A_23_P65768	UP	1.3021	0.0279	C15orf15	chromosome 15 open reading frame 15	translation	intracellular, nucleus, ribosome	structural constituent of ribosome
A_23_P141549	UP	1.2952	0.0619	RPS7	ribosomal protein S7	translation	cytosolic small ribosomal subunit (sensu Eukaryota, intracellular, nucleolus, ribosome	RNA binding, protein binding, structural constituent of ribosome
A_24_P50472	UP	1.2924	0.0195	LOC649839	similar to large subunit ribosomal protein L36a	translation	intracellular, ribosome	structural constituent of ribosome
A_23_P107750	DOWN	-1.2918	0.0547	EDG8	endothelial differentiation, sphingolipid G-protein-coupled receptor, 8	G-protein coupled receptor protein signaling pathway, signal transduction	integral to membrane, membrane	lysosphingolipid and lysophosphatidic acid receptor activity, receptor activity
A_23_P1206	UP	1.2904	0.0475	RPS24	ribosomal protein S24	translation	cytosolic small ribosomal subunit (sensu Eukaryota, intracellular	RNA binding, nucleotide binding, structural constituent of ribosome
A_23_P89380	DOWN	-1.2899	0.0173	IL8	interleukin 8	G-protein coupled receptor protein signaling pathway, angiogenesis, calcium-mediated signaling, cell cycle arrest, cell motility, cell-cell signaling, chemotaxis, immune response, induction of positive chemotaxis, inflammatory response, intracellular signaling cascade, negative regulation of cell proliferation, neutrophil activation, neutrophil chemotaxis, regulation of cell adhesion, regulation …	extracellular region, extracellular space	chemokine activity, interleukin-8 receptor binding, protein binding
A_32_P155364	UP	1.2884	0.0582	RPL7	ribosomal protein L7	translation	cytosolic large ribosomal subunit (sensu Eukaryota, intracellular, large ribosomal subunit	RNA binding, structural constituent of ribosome, transcription regulator activity
A_23_P104493	DOWN	-1.2856	0.0923	PAPSS2	3'-phosphoadenosine 5'-phosphosulfate synthase 2	nucleobase; nucleoside; nucleotide and nucleic acid metabolic process, skeletal development, sulfate assimilation	intracellular	ATP binding, adenylylsulfate kinase activity, nucleotide binding, nucleotidyltransferase activity, protein binding, sulfate adenylyltransferase (ATP
A_24_P118855	UP	1.2846	0.0121			translation	intracellular, ribosome	structural constituent of ribosome
A_23_P253012	UP	1.2835	0.059	GRAMD1C	GRAM domain containing 1C
A_24_P76120	DOWN	-1.2817	0.0452
A_23_P84929	DOWN	-1.28	0.0222	SLC38A5	solute carrier family 38, member 5
A_23_P25235	UP	1.2782	0.0362	CLEC4D	C-type lectin domain family 4, member D	immune response	integral to membrane, membrane	sugar binding
A_23_P258108	UP	1.2758	0.0374	LOC731224	similar to 60S ribosomal protein L9
A_24_P68649	DOWN	-1.2751	0.0402	RNPEP	arginyl aminopeptidase (aminopeptidase B)	protein processing, proteolysis	Golgi apparatus, extracellular region, plasma membrane	aminopeptidase B activity, epoxide hydrolase activity, membrane alanyl aminopeptidase activity, metal ion binding, zinc ion binding
A_32_P216809	DOWN	-1.2729	0.0197
A_23_P132139	DOWN	-1.272	0.0507	C21orf58	chromosome 21 open reading frame 58
A_32_P175991	UP	1.2679	0.0547
A_32_P20367	UP	1.2667	0.046	RPS7	ribosomal protein S7	translation	cytosolic small ribosomal subunit (sensu Eukaryota, intracellular, nucleolus, ribosome	RNA binding, protein binding, structural constituent of ribosome
A_23_P76480	UP	1.2651	0.0279
A_24_P128727	DOWN	-1.265	0.0953			G-protein coupled receptor protein signaling pathway, response to stimulus, sensory perception of smell, signal transduction	integral to membrane, membrane	olfactory receptor activity, receptor activity
A_23_P209011	DOWN	-1.2636	0.0452	BRD4	bromodomain containing 4		nucleus
A_24_P357847	DOWN	-1.2629	0.0249
A_32_P220307	UP	1.2628	0.0522	RPL39	ribosomal protein L39	translation	cytosolic large ribosomal subunit (sensu Eukaryota, intracellular, ribosome	RNA binding, structural constituent of ribosome
DCP_1_0	DOWN	-1.2614	0.0589
A_23_P135848	DOWN	-1.2611	0.0064	PROP1	prophet of Pit1, paired-like homeodomain transcription factor	blood vessel development, central nervous system development, dorsal/ventral pattern formation, gland development, negative regulation of apoptosis, organ morphogenesis, regulation of transcription; DNA-dependent	nucleus	RNA polymerase II transcription factor activity, protein binding, sequence-specific DNA binding, transcription factor activity
A_23_P377717	DOWN	-1.2591	0.0343	NOVA2	neuro-oncological ventral antigen 2		nucleus	RNA binding
A_24_P76868	DOWN	-1.2588	0.0173
A_24_P309317	DOWN	-1.2579	0.0603	PSAP	prosaposin (variant Gaucher disease and variant metachromatic leukodystrophy)	glycosphingolipid metabolic process, lipid metabolic process, lipid transport, lysosome organization and biogenesis, sphingolipid metabolic process	extracellular space, integral to membrane, lysosome	alpha-galactosidase activity, beta-galactosidase activity, cerebroside-sulfatase activity, enzyme activator activity, galactosylceramidase activity, glucosylceramidase activity, lipid binding, sphingomyelin phosphodiesterase activity
A_24_P366787	DOWN	-1.2579	0.034	FLJ42875	FLJ42875 protein
A_32_P128781	UP	1.2556	0.0503
A_32_P2333	UP	1.2554	0.0197	SUB1	SUB1 homolog (S. cerevisiae)	regulation of transcription from RNA polymerase II promoter, transcription	nucleus, transcription factor complex	DNA binding, protein binding, single-stranded DNA binding, transcription coactivator activity
A_24_P147927	UP	1.2538	0.0588	EFHC2	EF-hand domain (C-terminal) containing 2			calcium ion binding
A_32_P136319	UP	1.2526	0.0343	RPL36A	ribosomal protein L36a	biological_process, translation	cytoplasm, intracellular, ribosome	molecular_function, protein binding, structural constituent of ribosome
A_32_P39440	DOWN	-1.2516	0.0802
A_24_P349636	UP	1.2484	0.0372	LOC388401	similar to 60S ribosomal protein L7
A_23_P77980	DOWN	-1.2462	0.0192	SLC4A1	solute carrier family 4, anion exchanger, member 1 (erythrocyte membrane protein band 3, Diego blood group)	anion transport, cell ion homeostasis	cortical cytoskeleton, integral to membrane, integral to plasma membrane, membrane	anion transporter activity, inorganic anion exchanger activity, protein binding
A_23_P124632	DOWN	-1.2458	0.0182	IGHA1	immunoglobulin heavy constant alpha 1	antigen processing and presentation of peptide antigen via MHC class I	MHC class I protein complex	protein binding
A_24_P833097	DOWN	-1.2383	0.0388
A_24_P921933	UP	1.2372	0.0881	SFRS1	splicing factor, arginine/serine-rich 1 (splicing factor 2, alternate splicing factor)	RNA splicing, mRNA processing, mRNA splice site selection	nucleus, spliceosome	RNA binding, nucleotide binding, protein binding
A_24_P682285	DOWN	-1.2354	0.0302	HSPA1A	heat shock 70kDa protein 1A			ATP binding, nucleotide binding
A_23_P65506	DOWN	-1.2339	0.0503	SPTB	spectrin, beta, erythrocytic (includes spherocytosis, clinical type I)	barbed-end actin filament capping	cytoskeleton, membrane fraction, plasma membrane, protein complex, spectrin	actin binding, actin filament binding, protein binding, structural constituent of cytoskeleton
A_24_P50281	DOWN	-1.2335	0.056	LOC651702	hypothetical protein LOC651702
A_23_P131909	DOWN	-1.2327	0.0162	C20orf141	chromosome 20 open reading frame 141		integral to membrane, membrane
A_23_P212954	DOWN	-1.2259	0.0179	UGT2A1	UDP glucuronosyltransferase 2 family, polypeptide A1	detection of chemical stimulus, metabolic process, response to stimulus, sensory perception of smell	endoplasmic reticulum, integral to membrane, membrane, microsome	glucuronosyltransferase activity
A_23_P359214	DOWN	-1.2254	0.0896	LOC728449	hypothetical protein LOC728449
A_32_P186981	UP	1.2247	0.045	RPL17	ribosomal protein L17	positive regulation of I-kappaB kinase/NF-kappaB cascade, translation	intracellular, large ribosomal subunit	RNA binding, signal transducer activity, structural constituent of ribosome
A_23_P89691	DOWN	-1.2231	0.0994	SDK2	sidekick homolog 2 (chicken)	cell adhesion	integral to membrane, membrane	protein binding
A_23_P252758	DOWN	-1.2173	0.0518	KEL	Kell blood group, metallo-endopeptidase	protein amino acid N-linked glycosylation, proteolysis, vasoconstriction	cytoskeleton, integral to plasma membrane, membrane	endopeptidase activity, endothelin-converting enzyme activity, metal ion binding, metallopeptidase activity, neprilysin activity, protein binding, zinc ion binding
A_24_P823768	DOWN	-1.2172	0.0372
A_23_P29257	DOWN	-1.2169	0.0601	H1F0	H1 histone family, member 0	nucleosome assembly	chromosome, nucleosome, nucleus	DNA binding
A_23_P161837	DOWN	-1.2132	0.0213	MRVI1	murine retrovirus integration site 1 homolog		endoplasmic reticulum membrane
A_23_P129382	DOWN	-1.213	0.0345	TNP2	transition protein 2 (during histone to protamine replacement)	DNA packaging, acrosome reaction, cell differentiation, multicellular organismal development, penetration of zona pellucida, spermatogenesis	chromosome, nucleosome, nucleus	DNA binding, metal ion binding, zinc ion binding
A_24_P367191	UP	1.2111	0.0246	LOC652890	similar to 60S ribosomal protein L7
A_24_P384539	UP	1.2089	0.0522	LOC730452	similar to 60S ribosomal protein L7	translation	intracellular, ribosome	structural constituent of ribosome
A_32_P6769	DOWN	-1.2087	0.0817	D2HGDH	D-2-hydroxyglutarate dehydrogenase	cellular protein metabolic process, electron transport, lipid catabolic process, phospholipid metabolic process, response to calcium ion, response to cobalt ion, response to magnesium ion, response to manganese ion, response to zinc ion	mitochondrion	(R, oxidoreductase activity, phospholipase A2 activity, protein binding
A_24_P320328	UP	1.2083	0.0326	SUB1	SUB1 homolog (S. cerevisiae)	regulation of transcription from RNA polymerase II promoter, transcription	nucleus, transcription factor complex	DNA binding, protein binding, single-stranded DNA binding, transcription coactivator activity
A_24_P321525	DOWN	-1.2062	0.0832	RERG	RAS-like, estrogen-regulated, growth inhibitor	negative regulation of cell growth, negative regulation of cell proliferation, response to hormone stimulus, small GTPase mediated signal transduction	cytosol, intracellular, nucleus	GDP binding, GTP binding, GTPase activity, estrogen receptor binding, nucleotide binding
A_24_P367199	UP	1.2042	0.045
A_23_P211816	DOWN	-1.2035	0.0689	MAP4	microtubule-associated protein 4	negative regulation of microtubule depolymerization	microtubule, microtubule associated complex	structural molecule activity
A_32_P191696	UP	1.202	0.0708
A_23_P107238	UP	1.201	0.0388	MBTD1	mbt domain containing 1	regulation of transcription	nucleus	zinc ion binding
A_24_P375599	UP	1.2002	0.0923	LOC731681	similar to 60S ribosomal protein L9
A_24_P84808	UP	1.2	0.0722	LOC729449	similar to 60S ribosomal protein L7
A_24_P890536	UP	1.1976	0.0289
A_24_P8200	UP	1.1971	0.0896	SHPRH	SNF2 histone linker PHD RING helicase	DNA repair, nucleosome assembly, ubiquitin cycle	nucleosome, nucleus	ATP binding, DNA binding, helicase activity, hydrolase activity, ligase activity, metal ion binding, nucleotide binding, protein binding, zinc ion binding
A_24_P329597	UP	1.1961	0.0832	UBQLN1	ubiquilin 1	protein modification process	cytoplasm, cytosol, nucleus, perinuclear region of cytoplasm, protein complex	kinase binding
A_24_P33607	UP	1.1956	0.0195	LOC652558	similar to 60S ribosomal protein L7
A_24_P50554	UP	1.1891	0.0841	LOC391655	similar to 60S ribosomal protein L17 (L23)
A_23_P59921	UP	1.1878	0.0807	SUB1	SUB1 homolog (S. cerevisiae)	regulation of transcription from RNA polymerase II promoter, transcription	nucleus, transcription factor complex	DNA binding, protein binding, single-stranded DNA binding, transcription coactivator activity
A_23_P502425	UP	1.1877	0.0881	MRPL47	mitochondrial ribosomal protein L47	biological_process, translation	cellular_component, mitochondrial ribosome, mitochondrion, ribonucleoprotein complex	molecular_function, structural constituent of ribosome
A_24_P9883	DOWN	-1.1857	0.0309	DKFZp761E198	DKFZp761E198 protein
A_23_P302038	DOWN	-1.1845	0.0708	POU4F2	POU domain, class 4, transcription factor 2	axon guidance, negative regulation of transcription from RNA polymerase II promoter, nervous system development, neuron differentiation, regulation of transcription; DNA-dependent	nucleus	sequence-specific DNA binding, transcription factor activity
A_23_P8900	UP	1.1802	0.0547	COX6C	cytochrome c oxidase subunit VIc	electron transport	integral to membrane, membrane, mitochondrion	cytochrome-c oxidase activity, oxidoreductase activity
A_24_P263786	DOWN	-1.1798	0.0534
A_23_P212436	DOWN	-1.1796	0.0547	CTDSPL	CTD (carboxy-terminal domain, RNA polymerase II, polypeptide A) small phosphatase-like	biological_process	cellular_component, nucleus	molecular_function, phosphoric monoester hydrolase activity
A_24_P303770	DOWN	-1.1783	0.0627	CTSB	cathepsin B	proteolysis, regulation of apoptosis, regulation of catalytic activity	intracellular, lysosome, mitochondrion	cathepsin B activity, cysteine-type endopeptidase activity, protein binding
A_24_P384397	DOWN	-1.1751	0.0603	RAVER1	ribonucleoprotein, PTB-binding 1		nucleus	RNA binding, nucleotide binding
A_24_P255338	DOWN	-1.1748	0.0676	SEC24C	SEC24 related gene family, member C (S. cerevisiae)	ER to Golgi vesicle-mediated transport, intracellular protein transport	COPII vesicle coat, endoplasmic reticulum	molecular_function, protein binding, zinc ion binding
A_32_P529165	DOWN	-1.1746	0.0618	KIAA1462	KIAA1462
A_24_P712350	UP	1.1673	0.0472	CHML	choroideremia-like (Rab escort protein 2)	intracellular protein transport, regulation of GTPase activity, visual perception	Rab-protein geranylgeranyltransferase complex	GTPase activator activity, Rab escort protein activity, Rab-protein geranylgeranyltransferase activity
A_23_P14734	UP	1.1672	0.0923	RPS27L	ribosomal protein S27-like	biological_process, translation	cellular_component, intracellular, ribosome	metal ion binding, molecular_function, structural constituent of ribosome, zinc ion binding
A_24_P126890	UP	1.1671	0.0739	RPL9	ribosomal protein L9	translation	intracellular, ribosome	RNA binding, structural constituent of ribosome
A_24_P29001	UP	1.167	0.0507	LSM3	LSM3 homolog, U6 small nuclear RNA associated (S. cerevisiae)	RNA splicing, mRNA processing	nucleus, spliceosome	RNA binding, protein binding
A_23_P55616	DOWN	-1.1645	0.0781	SLC14A1	solute carrier family 14 (urea transporter), member 1 (Kidd blood group)	transport, urea transport, water transport	integral to membrane, integral to plasma membrane, plasma membrane	urea transporter activity, water transporter activity
A_23_P130761	DOWN	-1.164	0.0534	DBP	D site of albumin promoter (albumin D-box) binding protein	regulation of transcription from RNA polymerase II promoter, rhythmic process, transcription	nucleus	RNA polymerase II transcription factor activity, protein dimerization activity, sequence-specific DNA binding, transcription factor activity
A_23_P7066	UP	1.1595	0.0744	RPL9	ribosomal protein L9	translation	intracellular, ribosome	RNA binding, structural constituent of ribosome
A_24_P934546	DOWN	-1.1586	0.0739	SFRP2	secreted frizzled-related protein 2	Wnt receptor signaling pathway, cell differentiation, multicellular organismal development, somitogenesis
A_32_P8857	UP	1.1575	0.0459
A_23_P21747	DOWN	-1.1565	0.0503	CABP5	calcium binding protein 5	signal transduction	cellular_component	calcium ion binding
A_23_P308722	UP	1.1564	0.05	C2orf39	chromosome 2 open reading frame 39
A_32_P128588	UP	1.1552	0.0979
A_23_P31984	DOWN	-1.1549	0.0832	ACTL7A	actin-like 7A		cytoskeleton, male germ cell nucleus, microtubule-based flagellum	protein binding, structural constituent of cytoskeleton
A_24_P316074	UP	1.154	0.0522	LOC730902	similar to 60S ribosomal protein L7
A_23_P74619	DOWN	-1.1539	0.0603	SELENBP1	selenium binding protein 1			selenium binding
A_23_P200030	UP	1.1504	0.045	FPGT	fucose-1-phosphate guanylyltransferase	fucose metabolic process	cytoplasm	fucose-1-phosphate guanylyltransferase activity, transferase activity
A_23_P41114	UP	1.1447	0.0922	CSTA	cystatin A (stefin A)	keratinocyte differentiation, peptide cross-linking	cornified envelope, intracellular	cysteine protease inhibitor activity, protein binding; bridging, structural molecule activity
A_23_P102235	UP	1.1422	0.046	SNRPG	small nuclear ribonucleoprotein polypeptide G	RNA splicing, mRNA processing, spliceosome assembly	nucleus, small nuclear ribonucleoprotein complex, spliceosome	RNA binding, protein binding
A_23_P21862	DOWN	-1.1397	0.0688
A_32_P207231	UP	1.1373	0.0468
A_24_P298238	UP	1.1358	0.0588
A_24_P135242	UP	1.1335	0.0534
A_23_P207842	DOWN	-1.1321	0.0279	RARA	retinoic acid receptor, alpha	regulation of transcription; DNA-dependent, signal transduction, transcription	nucleus	metal ion binding, protein binding, retinoic acid receptor activity, sequence-specific DNA binding, steroid hormone receptor activity, transcription coactivator activity, transcription factor activity, zinc ion binding
A_24_P373768	DOWN	-1.1312	0.0675	GIPR	gastric inhibitory polypeptide receptor	G-protein coupled receptor protein signaling pathway, adenylate cyclase activation, generation of precursor metabolites and energy, response to nutrient	integral to membrane, plasma membrane	G-protein coupled receptor activity, gastric inhibitory peptide receptor activity
A_23_P14216	DOWN	-1.1311	0.0656
A_32_P169521	DOWN	-1.1309	0.0889
A_32_P86494	UP	1.1294	0.0522
A_23_P5679	DOWN	-1.1292	0.0896	CFC1	cripto, FRL-1, cryptic family 1	determination of left/right symmetry, gastrulation, multicellular organismal development	cellular_component	molecular_function
A_24_P169073	DOWN	-1.1282	0.0359	FAM131C	family with sequence similarity 131, member C
A_23_P146631	DOWN	-1.1274	0.0607	ZER1	zer-1 homolog (C. elegans)			protein binding
A_24_P490109	DOWN	-1.1266	0.0547
A_23_P53957	UP	1.1245	0.0733	C14orf112	chromosome 14 open reading frame 112		integral to membrane, membrane, mitochondrion
A_32_P116105	UP	1.124	0.0461
A_23_P81103	DOWN	-1.1222	0.0588	SFRP2	secreted frizzled-related protein 2	Wnt receptor signaling pathway, cell differentiation, multicellular organismal development, somitogenesis
A_23_P132863	UP	1.122	0.0961			RNA splicing, mRNA metabolic process, mRNA processing	nucleus, ribonucleoprotein complex, spliceosome	RNA binding, protein binding
A_24_P289625	DOWN	-1.1216	0.0934
A_24_P15765	UP	1.1203	0.0637
A_24_P145787	UP	1.1202	0.0655
A_32_P21384	UP	1.1197	0.0922	RPL17	ribosomal protein L17	positive regulation of I-kappaB kinase/NF-kappaB cascade, translation	intracellular, large ribosomal subunit	RNA binding, signal transducer activity, structural constituent of ribosome
A_32_P117697	UP	1.1195	0.056	LOC643790	high-mobility group nucleosome binding domain 1 pseudogene		chromatin, nucleus	DNA binding
A_32_P133038	UP	1.1172	0.059
A_24_P852001	DOWN	-1.1171	0.059			immune response	extracellular region	antigen binding
A_32_P33213	UP	1.1146	0.0681
A_23_P421563	UP	1.1145	0.0647	LSM3	LSM3 homolog, U6 small nuclear RNA associated (S. cerevisiae)	RNA splicing, mRNA processing	nucleus, spliceosome	RNA binding, protein binding
A_23_P71258	DOWN	-1.1127	0.0647	CYP3A43	cytochrome P450, family 3, subfamily A, polypeptide 43	electron transport, xenobiotic metabolic process	endoplasmic reticulum, membrane, membrane fraction, microsome	heme binding, iron ion binding, metal ion binding, monooxygenase activity, unspecific monooxygenase activity
A_23_P96191	DOWN	-1.1118	0.0582
A_23_P216108	DOWN	-1.1085	0.0343	ANK1	ankyrin 1, erythrocytic	cytoskeleton organization and biogenesis, exocytosis, maintenance of epithelial cell polarity, signal transduction	actin cytoskeleton, basolateral plasma membrane, plasma membrane	cytoskeletal adaptor activity, enzyme binding, spectrin binding, structural constituent of cytoskeleton
A_23_P87461	DOWN	-1.1075	0.0222	B4GALNT1	beta-1,4-N-acetyl-galactosaminyl transferase 1	carbohydrate metabolic process, ganglioside biosynthetic process, glycosphingolipid metabolic process, lipid glycosylation, sequestering of lipid	integral to Golgi membrane, integral to membrane, membrane, membrane fraction	(N-acetylneuraminyl, transferase activity, transferase activity; transferring hexosyl groups
A_24_P205100	DOWN	-1.1063	0.0486	E4F1	E4F transcription factor 1	cell proliferation	intracellular	metal ion binding, nucleic acid binding, transcription coactivator activity, transcription corepressor activity, transcription factor activity, zinc ion binding
A_23_P99693	UP	1.1043	0.0768	ZBTB1	zinc finger and BTB domain containing 1	regulation of transcription; DNA-dependent, transcription	intracellular, nucleus	DNA binding, metal ion binding, protein binding, zinc ion binding
A_32_P1516	UP	1.1037	0.0362
A_23_P93844	UP	1.103	0.0627	TOMM7	translocase of outer mitochondrial membrane 7 homolog (yeast)	intracellular protein transport	integral to membrane, membrane, mitochondrial outer membrane, mitochondrion, outer membrane	protein translocase activity
A_24_P702749	DOWN	-1.1029	0.0619
A_24_P357056	DOWN	-1.1013	0.0582	C22orf25	chromosome 22 open reading frame 25
A_32_P30075	DOWN	-1.1012	0.0798
A_24_P64407	DOWN	-1.1006	0.0896	HMX2	homeobox (H6 family) 2
A_23_P128192	UP	1.0991	0.0695	PFDN5	prefoldin subunit 5	protein folding, regulation of transcription; DNA-dependent	cytoplasm, nucleus, prefoldin complex	transcription corepressor activity, unfolded protein binding
A_24_P903715	DOWN	-1.0987	0.0628
A_32_P173385	UP	1.0966	0.0979
A_24_P311036	DOWN	-1.096	0.0841	MYOG	myogenin (myogenic factor 4)	cell differentiation, multicellular organismal development, regulation of transcription; DNA-dependent, striated muscle development, transcription from RNA polymerase II promoter	nucleus	transcription factor activity
A_24_P371053	UP	1.093	0.0708	ORMDL1	ORM1-like 1 (S. cerevisiae)		endoplasmic reticulum, endoplasmic reticulum membrane, integral to membrane, membrane
A_24_P17048	DOWN	-1.0906	0.0534	GHRHR	growth hormone releasing hormone receptor	G-protein coupled receptor protein signaling pathway, adenylate cyclase activation, biological_process, signal transduction, skeletal development	integral to membrane, membrane, plasma membrane	G-protein coupled receptor activity, growth hormone-releasing hormone receptor activity, receptor activity, vasoactive intestinal polypeptide receptor activity
A_24_P15550	DOWN	-1.0869	0.054			immune response	extracellular region	antigen binding
A_24_P282288	DOWN	-1.0857	0.0526
A_24_P418418	UP	1.085	0.0547	RPS17	ribosomal protein S17	translation	cytosolic small ribosomal subunit (sensu Eukaryota, intracellular, ribosome	RNA binding, structural constituent of ribosome
A_24_P165864	UP	1.0849	0.0986	P2RY14	purinergic receptor P2Y, G-protein coupled, 14	G-protein coupled receptor protein signaling pathway, signal transduction	integral to membrane, membrane	UDP-activated nucleotide receptor activity, purinergic nucleotide receptor activity; G-protein coupled, receptor activity, rhodopsin-like receptor activity
A_24_P203886	DOWN	-1.0837	0.0452
A_23_P101683	UP	1.082	0.0452	CLC	Charcot-Leyden crystal protein	lipid catabolic process, multicellular organismal development, phospholipid metabolic process		hydrolase activity, lysophospholipase activity, sugar binding
A_23_P164733	DOWN	-1.0771	0.0768	NUMBL	numb homolog (Drosophila)-like	axonogenesis, forebrain development, nervous system development, neuroblast proliferation	cytoplasm	protein binding
A_24_P813520	UP	1.0759	0.0886
A_24_P412734	DOWN	-1.0759	0.098	PRSS36	protease, serine, 36	proteolysis	cytoplasm, proteinaceous extracellular matrix	peptidase activity, serine-type endopeptidase activity
A_24_P919502	DOWN	-1.0752	0.063
A_23_P301995	DOWN	-1.07	0.0896	LIN9	lin-9 homolog (C. elegans)	DNA replication, cell cycle, negative regulation of progression through cell cycle	nucleus
A_24_P341126	DOWN	-1.0606	0.0655
A_24_P927553	DOWN	-1.0605	0.0601
A_23_P151544	DOWN	-1.0589	0.0889	DDX24	DEAD (Asp-Glu-Ala-Asp) box polypeptide 24	RNA metabolic process	cellular_component, nucleolus	ATP binding, ATP-dependent RNA helicase activity, RNA binding, hydrolase activity, nucleotide binding
A_23_P84670	DOWN	-1.0573	0.0803	GRIN1	glutamate receptor, ionotropic, N-methyl D-aspartate 1	calcium ion homeostasis, cation transport, glutamate signaling pathway, ion transport, learning and/or memory, regulation of synaptic plasticity, response to ethanol, synaptic transmission	N-methyl-D-aspartate selective glutamate receptor complex, dendrite, growth cone, integral to membrane, membrane, postsynaptic membrane	N-methyl-D-aspartate selective glutamate receptor activity, calcium ion binding, glutamate binding, glutamate-gated ion channel activity, glycine binding, glycine-gated ion channel activity, ion channel activity, ionotropic glutamate receptor activity, magnesium ion binding, motor activity, protein binding, receptor activity
A_23_P2077	DOWN	-1.0536	0.0971	OR4C3	olfactory receptor, family 4, subfamily C, member 3	G-protein coupled receptor protein signaling pathway, response to stimulus, sensory perception of smell, signal transduction	integral to membrane, membrane	olfactory receptor activity, receptor activity
A_23_P314052	DOWN	-1.0526	0.0934	TRIM58	tripartite motif-containing 58		intracellular	metal ion binding, protein binding, zinc ion binding
A_23_P348257	DOWN	-1.0525	0.0813	NUAK1	NUAK family, SNF1-like kinase, 1	protein amino acid phosphorylation		ATP binding, magnesium ion binding, nucleotide binding, protein binding, protein serine/threonine kinase activity, transferase activity
A_32_P158746	UP	1.0521	0.0486	RPL17	ribosomal protein L17	positive regulation of I-kappaB kinase/NF-kappaB cascade, translation	intracellular, large ribosomal subunit	RNA binding, signal transducer activity, structural constituent of ribosome
A_24_P64241	UP	1.0521	0.0896	ANKRD20A2	ankyrin repeat domain 20 family, member A2
A_23_P167537	DOWN	-1.0473	0.0841	CPLX2	complexin 2	mast cell degranulation, neurotransmitter transport, vesicle docking during exocytosis		syntaxin binding
A_23_P215751	UP	1.0456	0.0922	NDUFA5	NADH dehydrogenase (ubiquinone) 1 alpha subcomplex, 5, 13kDa	electron transport, mitochondrial electron transport; NADH to ubiquinone	mitochondrial inner membrane, mitochondrial respiratory chain complex I, mitochondrion	NADH dehydrogenase (ubiquinone, NADH dehydrogenase activity, oxidoreductase activity; acting on NADH or NADPH
A_23_P78092	UP	1.0447	0.0896	EVI2A	ecotropic viral integration site 2A		integral to membrane, membrane	transmembrane receptor activity
A_23_P72961	DOWN	-1.0434	0.0922	PRPS1	phosphoribosyl pyrophosphate synthetase 1	nervous system development, nucleoside metabolic process, nucleotide biosynthetic process, purine base metabolic process, ribonucleoside monophosphate biosynthetic process		kinase activity, magnesium ion binding, ribose phosphate diphosphokinase activity, transferase activity
A_24_P642328	DOWN	-1.0427	0.091
A_23_P157449	UP	1.0423	0.0637	POLR2K	polymerase (RNA) II (DNA directed) polypeptide K, 7.0kDa	regulation of transcription from RNA polymerase I promoter, transcription, transcription from RNA polymerase II promoter, transcription from RNA polymerase III promoter	DNA-directed RNA polymerase II; core complex, DNA-directed RNA polymerase III complex, nucleus	DNA binding, DNA-directed RNA polymerase activity, metal ion binding, transferase activity, zinc ion binding
A_23_P161091	UP	1.0421	0.0733	ZMYM1	zinc finger, MYM-type 1		nucleus	metal ion binding, protein dimerization activity, zinc ion binding
A_24_P136744	DOWN	-1.042	0.056
A_32_P117666	UP	1.0368	0.0929
A_24_P625382	DOWN	-1.032	0.0896	CSDA	cold shock domain protein A	negative regulation of transcription from RNA polymerase II promoter, regulation of transcription; DNA-dependent, response to cold, transcription	cytoplasm, nucleus	DNA binding, RNA polymerase II transcription factor activity, double-stranded DNA binding, transcription corepressor activity, transcription factor activity
A_23_P254797	DOWN	-1.0315	0.0589	BPIL1	bactericidal/permeability-increasing protein-like 1			lipid binding
A_24_P311063	DOWN	-1.0239	0.0934
A_23_P317244	DOWN	-1.0222	0.0708	SPACA3	sperm acrosome associated 3	cell wall catabolic process, defense response to Gram-positive bacterium, monocyte activation, peptidoglycan catabolic process, positive regulation of macrophage activation, positive regulation of phagocytosis, response to virus, sperm-egg recognition	acrosome, extracellular region, integral to membrane, membrane, secretory granule	bacterial binding, lysozyme activity
A_23_P1871	DOWN	-1.0154	0.0696
A_23_P136961	DOWN	-1.0136	0.0422
A_23_P122485	DOWN	-1.0051	0.0655
A_24_P314515	DOWN	-1.0008	0.0817	C12orf27	chromosome 12 open reading frame 27
A_24_P364807	UP	0.9989	0.059	AYTL1	acyltransferase like 1	metabolic process, phospholipid biosynthetic process	integral to membrane, membrane	acyltransferase activity, calcium ion binding, transferase activity
A_23_P35576	UP	0.9971	0.0832	ZNF518	zinc finger protein 518	regulation of transcription; DNA-dependent, transcription	intracellular, nucleus	DNA binding, metal ion binding, zinc ion binding
A_23_P211326	DOWN	-0.9953	0.0784	CECR2	cat eye syndrome chromosome region, candidate 2	DNA fragmentation during apoptosis, apoptosis, chromatin modification, cytokinesis, cytoskeleton organization and biogenesis, vesicle-mediated transport	nucleus
A_24_P15621	DOWN	-0.9819	0.0841	SLC6A10P	solute carrier family 6 (neurotransmitter transporter, creatine), member 10 (pseudogene)	neurotransmitter transport	integral to plasma membrane, membrane	neurotransmitter:sodium symporter activity, symporter activity
A_24_P522678	DOWN	-0.9817	0.0987
A_32_P385587	DOWN	-0.9721	0.0396	ALAS2	aminolevulinate, delta-, synthase 2 (sideroblastic/hypochromic anemia)	biosynthetic process, erythrocyte differentiation, heme biosynthetic process, hemoglobin biosynthetic process, oxygen homeostasis, response to hypoxia, tetrapyrrole biosynthetic process	endoplasmic reticulum, integral to membrane, membrane, mitochondrial inner membrane, mitochondrion	5-aminolevulinate synthase activity, acyltransferase activity, protein binding, pyridoxal phosphate binding, transferase activity; transferring nitrogenous groups
A_23_P216689	DOWN	-0.9671	0.0676	BRD3	bromodomain containing 3	biological_process	nucleus	molecular_function
A_24_P933228	DOWN	-0.965	0.0547	IL8RB	interleukin 8 receptor, beta	G-protein signaling; coupled to IP3 second messenger (phospholipase C activating, apoptosis, cellular defense response, chemotaxis, inflammatory response, neutrophil activation, neutrophil chemotaxis, positive regulation of cell proliferation	cell surface, integral to plasma membrane, intracellular, mast cell granule, membrane	interleukin-8 receptor activity, receptor activity, rhodopsin-like receptor activity
A_23_P331598	UP	0.9632	0.0813	IPO7	importin 7	intracellular protein transport, protein import into nucleus; docking, signal transduction	cytoplasm, nuclear pore, nucleus, soluble fraction	Ran GTPase binding, histone binding, protein transporter activity, small GTPase regulator activity
A_23_P160481	DOWN	-0.9489	0.0922	IQWD1	IQ motif and WD repeats 1			receptor activity
A_24_P136453	DOWN	-0.9484	0.0922	TNS1	tensin 1	intracellular signaling cascade	cytoskeleton	actin binding
A_32_P49334	UP	0.9369	0.0923	LOC284889	hypothetical protein LOC284889
A_32_P102062	DOWN	-0.9343	0.0934	FOXO3	forkhead box O3	antral ovarian follicle growth, apoptosis, glucose homeostasis, induction of apoptosis, initiation of primordial ovarian follicle growth, oocyte maturation, ovulation (sensu Mammalia, positive regulation of erythrocyte differentiation, positive regulation of transcription from RNA polymerase II promoter, regulation of transcription; DNA-dependent, response to DNA damage stimulus, transcription	cytoplasm, membrane fraction, nucleus	protein kinase binding, sequence-specific DNA binding, transcription factor activity, transcriptional activator activity
A_23_P128808	DOWN	-0.9287	0.0935	GPR132	G protein-coupled receptor 132	G-protein coupled receptor protein signaling pathway, G1/S transition of mitotic cell cycle, signal transduction	integral to membrane, membrane	receptor activity, rhodopsin-like receptor activity
A_23_P155765	UP	0.9246	0.0832	HMGB2	high-mobility group box 2	DNA repair, DNA replication, DNA unwinding during replication, base-excision repair; DNA ligation, establishment and/or maintenance of chromatin architecture, nucleosome assembly, phosphoinositide-mediated signaling, regulation of transcription from RNA polymerase II promoter	chromatin, condensed chromosome, cytoplasm, nuclear chromosome, nucleus, perinuclear region of cytoplasm	DNA bending activity, double-stranded DNA binding, single-stranded DNA binding, transcription factor activity
A_23_P26021	UP	0.9165	0.0733	COPS2	COP9 constitutive photomorphogenic homolog subunit 2 (Arabidopsis)	cell proliferation, negative regulation of transcription, signal transduction, transcription from RNA polymerase II promoter	cytoplasm, nucleus, signalosome complex	protein binding, signal transducer activity, transcription corepressor activity
A_24_P148235	UP	0.9059	0.0637	RPS27	ribosomal protein S27 (metallopanstimulin 1)	cell proliferation, signal transduction, translation	cytosolic small ribosomal subunit (sensu Eukaryota, intracellular, ribosome	RNA binding, metal ion binding, structural constituent of ribosome, zinc ion binding
A_32_P47222	UP	0.904	0.0679
